# Supplementary material
Source: Springer Nature journal article supplement (https://www.springermedizin.de/resource/supplementary/12986_2007_135_MOESM1_ESM.pdf/25655438)
Supplement: MOESM1 [file 25655438]

**Nutrition Facts**

Serving Size 1 Packet (82g)

Servings Per Container 14

## Amount Per Serving

**Calories** 300 **Calories from Fat** 45

|                           |       | % Daily Value* |
|---------------------------|-------|----------------|
| <b>Total Fat</b>          | 5g    | <b>8%</b>      |
| Saturated Fat             | 1g    | <b>5%</b>      |
| Trans Fat                 | 0g    |                |
| <b>Cholesterol</b>        | 15mg  | <b>5%</b>      |
| <b>Sodium</b>             | 340mg | <b>14%</b>     |
| <b>Potassium</b>          | 920mg | <b>26%</b>     |
| <b>Total Carbohydrate</b> | 25g   | <b>8%</b>      |
| Dietary Fiber             | 6g    | <b>24%</b>     |
| Sugars                    | 1g    |                |
| <b>Protein</b>            | 40g   |                |

|                         |      |                   |      |
|-------------------------|------|-------------------|------|
| <b>Vitamin A</b>        | 100% | <b>Vitamin C</b>  | 830% |
| <b>Calcium</b>          | 50%  | <b>Iron</b>       | 10%  |
| <b>Vitamin D</b>        | 50%  | <b>Vitamin E</b>  | 100% |
| <b>Vitamin K</b>        | 50%  | <b>Thiamin</b>    | 50%  |
| <b>Riboflavin</b>       | 50%  | <b>Niacin</b>     | 50%  |
| <b>Vitamin B6</b>       | 50%  | <b>Folate</b>     | 50%  |
| <b>Vitamin B12</b>      | 50%  | <b>Biotin</b>     | 50%  |
| <b>Pantothenic Acid</b> | 50%  | <b>Phosphorus</b> | 35%  |
| <b>Iodine</b>           | 50%  | <b>Magnesium</b>  | 120% |
| <b>Zinc</b>             | 50%  | <b>Selenium</b>   | 100% |
| <b>Copper</b>           | 25%  | <b>Manganese</b>  | 25%  |
| <b>Chromium</b>         | 50%  | <b>Molybdenum</b> | 50%  |

\*Percent Daily Values are based on a 2,000 calorie diet. Your daily values may be higher or lower depending on your calorie needs

**INGREDIENTS:** FS Tru-Pro™ (Whey Protein Isolate, Whey Protein Concentrate, Calcium Caseinate, Milk Protein Isolate, L-Glutamine, Taurine, Tyrosine, Aminogen Enzyme), FS Energy™ (Glucose Polymers, Hydrolyzed Oat Flour, Fibersol [Soluble Fiber], Polydextrose), High Oleic Sunflower Oil, FS Vitamin and Mineral Blend (Potassium Chloride, Magnesium Oxide, Tricalcium Phosphate, Sodium Ascorbate, Zinc Amino Acid Chelate, d-Alpha Tocopheryl Acetate, Niacinamide, Iron Amino Acid Chelate, Selenium Amino Acid Chelate, d-Calcium Pantothenate, Copper Amino Acid Chelate, Manganese Amino Acid Chelate, Molybdenum Amino Acid Chelate, Pyridoxine Hydrochloride, Riboflavin, Thiamin Hydrochloride, Chromium Picolinate, Vitamin D3, Folic Acid, Biotin, Potassium Iodide, Vitamin K, and Cyanocobalamin), Natural & Artificial Flavors, Carrageenan, Soy Lecithin, Cellulose Gum, Salt, Beta Carotene, Sucralose, FS Probiotic Blend (Lactobacillus acidophilus, Lactobacillus plantarum, Lactobacillus paracasei, Bifidobacterium bifidum, Bifidobacterium breve, Bifidobacterium lactis).

**Nutrition Facts**

Serving Size 1 Packet (85g)

Servings Per Container 14

## Amount Per Serving

**Calories** 300 **Calories from Fat** 45

|                           |        | % Daily Value* |
|---------------------------|--------|----------------|
| <b>Total Fat</b>          | 5g     | <b>8%</b>      |
| Saturated Fat             | 1g     | <b>5%</b>      |
| Trans Fat                 | 0g     |                |
| <b>Cholesterol</b>        | 15mg   | <b>5%</b>      |
| <b>Sodium</b>             | 350mg  | <b>15%</b>     |
| <b>Potassium</b>          | 1570mg | <b>45%</b>     |
| <b>Total Carbohydrate</b> | 25g    | <b>8%</b>      |
| Dietary Fiber             | 6g     | <b>24%</b>     |
| Sugars                    | 3g     |                |
| <b>Protein</b>            | 40g    |                |

|                         |      |                   |      |
|-------------------------|------|-------------------|------|
| <b>Vitamin A</b>        | 100% | <b>Vitamin C</b>  | 830% |
| <b>Calcium</b>          | 50%  | <b>Iron</b>       | 10%  |
| <b>Vitamin D</b>        | 50%  | <b>Vitamin E</b>  | 100% |
| <b>Vitamin K</b>        | 50%  | <b>Thiamin</b>    | 50%  |
| <b>Riboflavin</b>       | 50%  | <b>Niacin</b>     | 50%  |
| <b>Vitamin B6</b>       | 50%  | <b>Folate</b>     | 50%  |
| <b>Vitamin B12</b>      | 50%  | <b>Biotin</b>     | 50%  |
| <b>Pantothenic Acid</b> | 50%  | <b>Phosphorus</b> | 35%  |
| <b>Iodine</b>           | 50%  | <b>Magnesium</b>  | 120% |
| <b>Zinc</b>             | 50%  | <b>Selenium</b>   | 100% |
| <b>Copper</b>           | 25%  | <b>Manganese</b>  | 25%  |
| <b>Chromium</b>         | 50%  | <b>Molybdenum</b> | 50%  |

\*Percent Daily Values are based on a 2,000 calorie diet. Your daily values may be higher or lower depending on your calorie needs

**INGREDIENTS:** FS Tru-Pro™ (Whey Protein Isolate, Whey Protein Concentrate, Calcium Caseinate, Milk Protein Isolate, L-Glutamine, Taurine, Tyrosine, Aminogen Enzyme), FS Energy™ (Glucose Polymers, Hydrolyzed Oat Flour, Fibersol [Soluble Fiber], Polydextrose), Dutch-Processed Cocoa, High Oleic Sunflower Oil, FS Vitamin and Mineral Blend (Potassium Chloride, Magnesium Oxide, Tricalcium Phosphate, Sodium Ascorbate, Zinc Amino Acid Chelate, d-Alpha Tocopheryl Acetate, Niacinamide, Iron Amino Acid Chelate, Selenium Amino Acid Chelate, d-Calcium Pantothenate, Copper Amino Acid Chelate, Manganese Amino Acid Chelate, Molybdenum Amino Acid Chelate, Pyridoxine Hydrochloride, Riboflavin, Thiamin Hydrochloride, Chromium Picolinate, Vitamin D3, Folic Acid, Biotin, Potassium Iodide, Vitamin K, and Cyanocobalamin), Natural & Artificial Flavors, Honey Powder, Carrageenan, Soy Lecithin, Cellulose Gum, Salt, Beta Carotene, Sucralose, FS Probiotic Blend (Lactobacillus acidophilus, Lactobacillus plantarum, Lactobacillus paracasei, Bifidobacterium bifidum, Bifidobacterium breve, Bifidobacterium lactis).
